# Supplementary material for: A CRISPR/Cas12a-Based System for Sensitive Detection of Antimicrobial-Resistant Genes in Carbapenem-Resistant Enterobacterales
Source: MDPI journal article supplement (doi:10.3390/bios14040194), 2024-04-16
Supplement: s1 [file s1]

## Supplementary Material

**a**

### Consensus

NDM-1 NG 049326.1  
NDM-2 NG 049334.1  
NDM-3 NG 049335.1  
NDM-4 NG 049336.1  
NDM-5 NG 049337.1  
NDM-6 NG 049338.1  
NDM-7 NG 049339.1  
NDM-8 NG 049340.1  
NDM-9 NG 049341.1  
NDM-10 NG 049327.  
NDM-11 NG. 049328.  
NDM-12 NG. 049330.  
NDM-13 NG. 049331.  
NDM-14 NG. 049331.  
NDM-15 NG. 049332.  
NDM-16a 049333.1  
NDM-16b 047726.1  
NDM-17 NG 052662.  
NDM-18 NG 052866.  
NDM-19 NG 054598.  
NDM-20 NG 057455.  
NDM-21 NG 055664.  
NDM-22 NG 057612.  
NDM-23 NG 060570.  
NDM-24 NG 060571.  
NDM-25 NG 066711.  
NDM-26 NG 067144.  
NDM-27 NG 062358.  
NDM-28 NG 064729.  
NDM-29 NG 067145.  
NDM-30 NG 071206.  
NDM-31 NG 071207.

[illegible]

**b**

## Consensus

NDM-1 NC\_049326.1  
NDM-2 NC\_049334.1  
NDM-3 NC\_049335.1  
NDM-4 NC\_049336.1  
NDM-5 NC\_049337.1  
NDM-6 NC\_049338.1  
NDM-7 NC\_049339.1  
NDM-8 NC\_049340.1  
NDM-9 NC\_049341.1  
NDM-10 NC\_049327.1  
NDM-11 NC\_049328.1  
NDM-12 NC\_049329.1  
NDM-13 NC\_049330.1  
NDM-14 NC\_049331.1  
NDM-15 NC\_049332.1  
NDM-16a NC\_049333.1  
NDM-16b 074726.1  
NDM-17 NC\_052662.1  
NDM-18 NC\_052866.1  
NDM-19 NC\_054948.1  
NDM-20 NC\_057565.1  
NDM-22 NC\_057612.1  
NDM-23 NC\_060570.1  
NDM-24 NC\_060571.1  
NDM-25 NC\_066711.1  
NDM-26 NC\_067144.1  
NDM-27 NC\_062358.1  
NDM-28 NC\_064729.1  
NDM-29 NC\_067145.1  
NDM-30 NC\_071206.1  
NDM-31 NC\_071207.1

[illegible]



## Consensus

- NDM-1 NG\_049326.1
- NDM-2 NG\_049334.1
- NDM-3 NG\_049335.1
- NDM-4 NG\_049336.1
- NDM-5 NG\_049337.1
- NDM-6 NG\_049338.1
- NDM-7 NG\_049339.1
- NDM-8 NG\_049340.1
- NDM-9 NG\_049341.1
- NDM-10 NG\_049327.1
- NDM-11 NG\_049328.1
- NDM-12 NG\_049329.1
- NDM-13 NG\_049330.1
- NDM-14 NG\_049331.1
- NDM-15 NG\_049332.1
- NDM-16a\_049333.1
- NDM-16b\_074726.1
- NDM-17 NG\_052662.1
- NDM-18 NG\_052866.1
- NDM-19 NG\_055498.1
- NDM-20 NG\_057455.1
- NDM-21 NG\_055644.1
- NDM-22 NG\_056512.1
- NDM-23 NG\_060570.1
- NDM-24 NG\_060571.1
- NDM-25 NG\_061711.1
- NDM-26 NG\_061744.1
- NDM-27 NG\_062358.1
- NDM-28 NG\_064729.1
- NDM-29 NG\_067145.1
- NDM-30 NG\_071206.1
- NDM-31 NG\_071207.1

[illegible]

**Consensus**

- NDM-1 NG\_049326.1
- NDM-2 NG\_049334.1
- NDM-3 NG\_049335.1
- NDM-4 NG\_049336.1
- NDM-5 NG\_049337.1
- NDM-6 NG\_049338.1
- NDM-7 NG\_049339.1
- NDM-8 NG\_049340.1
- NDM-9 NG\_049341.1
- NDM-10 NG\_049327.1
- NDM-11 NG\_049328.1
- NDM-12 NG\_049329.1
- NDM-13 NG\_049330.1
- NDM-14 NG\_049331.1
- NDM-15 NG\_049332.1
- NDM-16a\_049333.1
- NDM-16b\_074726.1
- NDM-17 NG\_052662.1
- NDM-18 NG\_052866.1
- NDM-19 NG\_054981.1
- NDM-20 NG\_057455.1
- NDM-21 NG\_055644.1
- NDM-22 NG\_056172.1
- NDM-23 NG\_060570.1
- NDM-24 NG\_060571.1
- NDM-25 NG\_060571.1
- NDM-26 NG\_067144.1
- NDM-27 NG\_062358.1
- NDM-28 NG\_064729.1
- NDM-29 NG\_067145.1
- NDM-30 NG\_071206.1
- NDM-31 NG\_071207.1

[illegible]



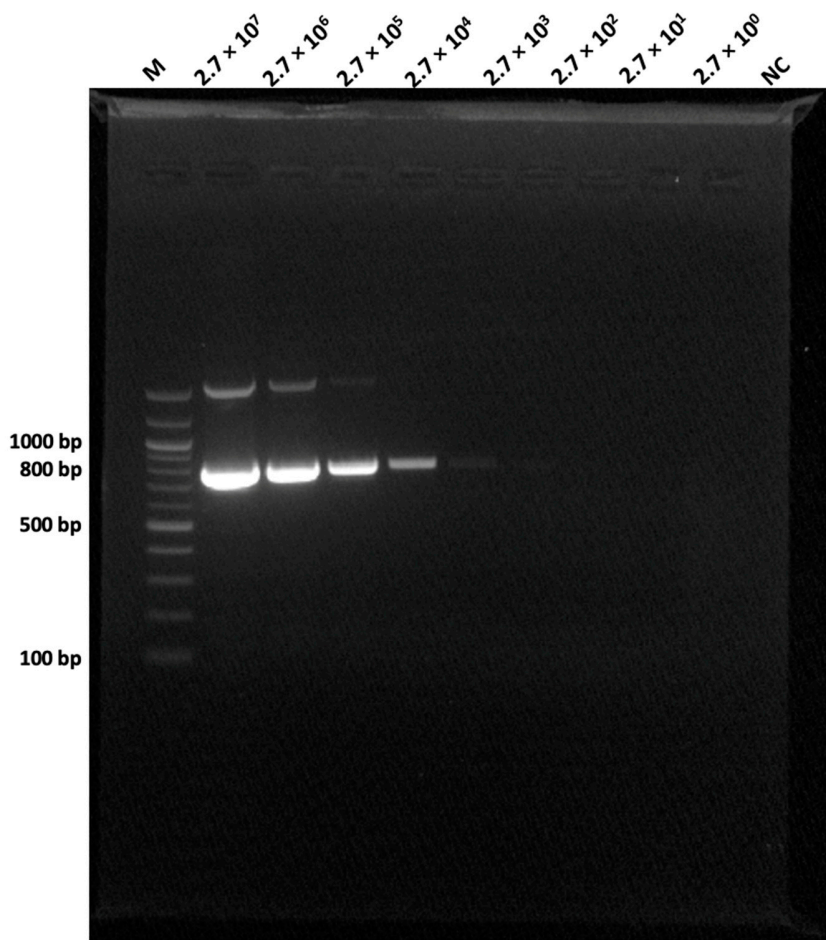

Figure S2. Original gel-electrophoresis image of amplified blandM-targeted gene. Lane M: 100 bp ladder; Lanes 1-9: ATCC BAA 2471  $2.7 \times 10^7$  to  $2.7 \times 10^0$  CFU/mL, NC. In this case, NC refers to replacing bacterial-genome extract with nuclease-free water
